1 **Title:** Identification of an ANCA-Associated Vasculitis Cohort Using Deep Learning and  
2 Electronic Health Records

3 **Running head:** Deep Learning in ANCA-Associated Vasculitis Identification

4 **Authors:** Liqin Wang, PhD<sup>1</sup>; John Novoa-Laurentiev, MS<sup>1</sup>; Claire Cook, MPH<sup>2</sup>; Shruthi  
5 Srivatsan, BA<sup>2</sup>; Yining Hua, MS<sup>3</sup>; Jie Yang, PhD<sup>4</sup>; Eli Miloslavsky, MD<sup>5</sup>; Hyon K. Choi,  
6 MD, DrPH<sup>2</sup>; Li Zhou, MD, PhD<sup>1</sup>, Zachary S. Wallace, MD, MSc<sup>2</sup>

7 **Affiliations:**

8 <sup>1</sup>Division of General Internal Medicine and Primary Care, Department of Medicine,  
9 Brigham and Women's Hospital and Harvard Medical School, Boston, Massachusetts,  
10 USA

11 (*lwang@bwh.harvard.edu, jlaurentiev@bwh.harvard.edu, lzhou@bwh.harvard.edu*)

12 <sup>2</sup> Rheumatology and Allergy Clinical Epidemiology Research Center and Division of  
13 Rheumatology, Allergy, and Immunology, and Mongan Institute, Department of  
14 Medicine, Massachusetts General Hospital, Boston, MA, USA

15 (*ccook13@mgh.harvard.edu, ssrivatsan1@mgh.harvard.edu, hchoi@mgh.harvard.edu,*  
16 *zswallace@mgh.harvard.edu*)

17 <sup>3</sup>Department of Epidemiology, Harvard T.H. Chan School of Public Health

18 (*yining\_hua@hms.harvard.edu*)

19 <sup>4</sup>Division of Pharmacoepidemiology and Pharmacoeconomics, Department of Medicine,  
20 Brigham and Women's Hospital and Harvard Medical School, Boston, Massachusetts,  
21 USA (*jyang66@bwh.harvard.edu*)

22 <sup>5</sup> Division of Rheumatology, Allergy, and Immunology, Massachusetts General Hospital  
23 and Harvard Medical School, Boston, MA, USA (*emiloslavsky@mgh.harvard.edu*)

24 **Funding support:** Authors of this work are supported by the National Institutes of  
25 Health [grant numbers K23AR073334, R03AR078938, L30AR070520, R03AR078938,  
26 K99AG075190]. The funders had no role in the design and conduct of the study;  
27 collection, management, analysis, and interpretation of the data; preparation, review, or  
28 approval of the manuscript; and decision to submit the manuscript for publication.

29 **Conflict of Interest:** ZSW reports research support from Amgen, Bristol-Myers Squibb,  
30 and Principia/Sanofi, consulting fees from Amgen, Viela Bio, Horizon, Zenas  
31 Biopharma, PPD, and MedPace, and has served on advisory boards for Amgen,  
32 Horizon, Novartis, Sanofi, Shinogi, and Visterra/Otsuka. All other authors report no  
33 disclosures.

34 **Corresponding Author:**

35 Liqin Wang, Ph.D.

36 Division of General Internal Medicine and Primary Care

37 Brigham and Women's Hospital

38 399 Revolution Drive, AR01-13-E58

39 Somerville, MA 02145, USA

40 Tel: 857-282-4089 | Fax: 857-282-5754 | E-mail: [lwang@bwh.harvard.edu](mailto:lwang@bwh.harvard.edu)

41

42 **Content:**

43 **Word count:** Abstract 273; Manuscript 3899

44 **Figures:** 2

45 **Tables:** 4

46 **References:** 14

47 **ABSTRACT**

48 **Background:** ANCA-associated vasculitis (AAV) is a rare but serious disease.

49 Traditional case-identification methods using claims data can be time-intensive and may  
50 miss important subgroups. We hypothesized that a deep learning model analyzing  
51 electronic health records (EHR) can more accurately identify AAV cases.

52 **Methods:** We examined the Mass General Brigham (MGB) repository of clinical  
53 documentation from 12/1/1979 to 5/11/2021, using expert-curated keywords and ICD  
54 codes to identify a large cohort of potential AAV cases. Three labeled datasets (I, II, III)  
55 were created, each containing note sections. We trained and evaluated a range of  
56 machine learning and deep learning algorithms for note-level classification, using  
57 metrics like positive predictive value (PPV), sensitivity, F-score, area under the receiver  
58 operating characteristic curve (AUROC), and area under the precision and recall curve  
59 (AUPRC). The deep learning model was further evaluated for its ability to classify AAV  
60 cases at the patient-level, compared with rule-based algorithms in 2,000 randomly  
61 chosen samples.

62 **Results:** Datasets I, II, and III comprised 6,000, 3,008, and 7,500 note sections,  
63 respectively. Deep learning achieved the highest AUROC in all three datasets, with  
64 scores of 0.983, 0.991, and 0.991. The deep learning approach also had among the  
65 highest PPVs across the three datasets (0.941, 0.954, and 0.800, respectively). In a test  
66 cohort of 2,000 cases, the deep learning model achieved a PPV of 0.262 and an  
67 estimated sensitivity of 0.975. Compared to the best rule-based algorithm, the deep  
68 learning model identified six additional AAV cases, representing 13% of the total.

69 **Conclusion:** The deep learning model effectively classifies clinical note sections for  
70 AAV diagnosis. Its application to EHR notes can potentially uncover additional cases  
71 missed by traditional rule-based methods.

72 **Keywords:** ANCA-associated vasculitis; Case Identification; Deep Learning; Machine  
73 learning; Electronic Health Records; Clinical Notes

74  
75 **SIGNIFICANCE AND INNOVATIONS:**

- 76 - Traditional approaches to identifying AAV cases for research have relied on  
77 registries assembled through clinical care and/or on billing codes which may miss  
78 important subgroups.
- 79 - Unstructured data entered as free text by clinicians document a patient's  
80 diagnosis, symptoms, manifestations, and other features of their condition which  
81 may be useful for identifying AAV cases
- 82 - We found that a deep learning approach can classify notes as being indicative of  
83 AAV and, when applied at the case level, identifies more cases with AAV than  
84 rule-based algorithms.

85 **INTRODUCTION**

86 Anti-neutrophil cytoplasmic autoantibody (ANCA)-associated vasculitis (AAV) is a rare  
87 immune-mediated inflammatory disease associated with substantial morbidity, mortality,  
88 and resource utilization.<sup>1, 2</sup> The disease presents in patients with heterogeneous  
89 manifestations (e.g., glomerulonephritis, sinusitis, skin rash, pulmonary nodules) to  
90 clinicians from a variety of specialties (e.g., rheumatology, nephrology, otolaryngology,  
91 intensive care) across the care spectrum within healthcare systems (e.g., community  
92 hospital, tertiary care hospital, outpatient clinic, emergency departments). AAV case  
93 identification in electronic health records (EHR), an increasingly important source for  
94 epidemiologic research, is limited by a lack of well-performing methods to identify  
95 cases.

96  
97 To enable outcomes and comparative effectiveness studies using large, phenotypically  
98 diverse cohorts from big data, a novel AAV case-finding algorithm is needed. Previous  
99 studies have demonstrated that rule-based algorithms relying on ICD-9 codes for AAV  
100 case identification have poor performance, partly because there is no specific ICD-9  
101 code for microscopic polyangiitis (MPA), a subtype of AAV, and many MPA patients  
102 may be miscoded using less specific ICD-9 codes. Additionally, the previously  
103 developed algorithms, which require a positive ANCA test result or the use of multiple  
104 ICD codes, may exclude important and informative subgroups of patients, including  
105 ANCA-negative granulomatosis with polyangiitis (GPA) and those who die soon after  
106 diagnosis from severe disease or complications. The performance of algorithms that  
107 incorporate ICD-10 codes has not been previously assessed.

108

109 In addition to billing code data and test results, EHR data include unstructured data  
110 entered as free text by clinicians documenting a patient's diagnosis, symptoms,  
111 manifestations, and other features of their condition. We have previously demonstrated  
112 that these notes can be leveraged to characterize the temporal course of AAV.<sup>3</sup> Other  
113 studies have suggested that unstructured data can enhance the performance of case-  
114 finding algorithms for other conditions, but this remains underexplored for prototypic  
115 rare conditions like AAV.<sup>4-7</sup> Here, we hypothesized that machine learning methods could  
116 be utilized to develop case-finding algorithms that accurately identify AAV patients and  
117 that these algorithms would outperform or produce more phenotypically diverse cohorts  
118 than rule-based algorithms.

119

## 120 **MATERIALS AND METHODS**

### 121 **Overview**

122 This study was conducted at Mass General Brigham (MGB), a large, integrated  
123 healthcare delivery system in the Greater Boston area, Massachusetts. We used data  
124 from MGB's research patient data registry (RPDR). The study was approved by the  
125 MGB's Institutional Review Board (IRB number: 2016P000633). **Figure 1** illustrates the  
126 overall process for the development of the AAV case-finding algorithms. We first  
127 created a screening cohort of potential AAV cases. We then created three labeled  
128 datasets from three cohorts for the development and evaluation of multiple machine  
129 learning models for AAV case identification from unstructured clinical notes. The deep  
130 learning model was further deployed to identify AAV patients from a random sub-cohort

131 of patients. The performance of this model was compared against rule-based  
132 approaches.

133

### 134 **Study Cohorts**

135 The screening cohort was constructed using all data from RPDR, spanning its inception  
136 on December 1, 1979, through May 11, 2021. We identified potential AAV patients  
137 based on the presence of at least one AAV-related ICD code in a diagnosis field or the  
138 use of a keyword in clinical notes. **Supplemental Table 1** lists keywords selected by the  
139 subject-matter experts (EM and ZSW). To develop and evaluate the performance of  
140 machine learning algorithms for AAV case identification, we used three distinct cohorts.  
141 Cohort A comprised 700 patients with confirmed AAV, as they were previously identified  
142 as part of the MGB AAV Cohort between January 01, 2002, and December 31, 2019.<sup>8</sup>  
143 Cohorts B and C were random samples of 1000 patients each from the screening  
144 cohort.

145

### 146 **Processing of Clinical Notes**

147 For each study cohort, we extracted all available clinical notes included in RPDR  
148 database any time before July 23, 2021. These notes encompassed visit notes,  
149 progress notes, ambulatory notes, history and physical exam notes, and discharge  
150 summaries. Clinical notes contain rich information, such as clinical manifestations,  
151 physical exams, and differential diagnoses, which are useful to determine whether  
152 patient does or does not have AAV. However, due to the voluminous number of notes  
153 that each patient accumulates over years of interaction with a healthcare system, the

154 model could miss true signals when handling large datasets. Thus, we processed each  
155 note into smaller sections and then applied the models being tested to evaluate their  
156 ability to predict whether or not the text refers to a diagnosis of AAV. To split the notes  
157 into sections, we used Medical Text Extraction, Reasoning, and Mapping System  
158 (MTERMS), an in-house developed natural language processing (NLP) system.<sup>9</sup>

159

### 160 **Definition of AAV Classification Task**

161 We approached the identification of AAV as a classification task, training models for  
162 binary classification of note sections as pertaining to AAV. Throughout model  
163 development, we assessed and compared the effectiveness of these models at the note  
164 section level. In practical applications for patient identification, a patient was classified  
165 as having AAV if any of their note sections were predicted positive, suggesting an AAV  
166 diagnosis. Conversely, a patient was deemed not to have AAV if all their note sections  
167 were predicted negative.

168

### 169 **Development of Labeled Datasets**

170 We developed three labeled datasets to train, test, and compare multiple machine  
171 learning algorithms. Datasets I and II contained note sections that were derived from the  
172 same population, i.e., patients with validated AAV (Cohort A) as well as patients with  
173 possible AAV (Cohort B). To increase the positive case density in Dataset I, we applied  
174 a list of expert-curated keywords to filter for sections that likely contain references to a  
175 diagnosis of AAV or the presence of AAV manifestations (**Supplemental Table 2**). To  
176 assess the generalizability of the trained models to note sections, regardless of keyword



177 presence, we established Dataset II by randomly selecting note sections from those not  
178 included in Dataset I. Specifically, Dataset I included 5,000 sections from cohort A and  
179 1,000 sections from cohort B, all mentioning specific keywords. Dataset II contains  
180 2,000 sections from cohort A and 1,000 sections from cohort B, selected randomly  
181 without considering keyword references. Dataset III consists of 7,500 note sections  
182 randomly selected from Cohort C, a subset of the screening cohort, to evaluate model  
183 performance in identifying potential AAV patients.

184

### 185 **Dataset Annotation**

186 Two subject matter experts (ZSW and CC) labeled each selected section from clinical  
187 notes for whether it indicated that the diagnosis of AAV was present. Cases were  
188 classified as AAV based on a prior algorithm for identifying AAV in epidemiologic  
189 studies.<sup>10</sup> In cases where there was limited data available to apply this algorithm, we  
190 classified a case as AAV if the treating provider and both chart reviewers agreed on the  
191 classification of the case as AAV. Patients with eosinophilic granulomatosis with  
192 polyangiitis (EGPA) were classified as negative. Although EGPA is a specific type of  
193 AAV, it presents a different etiology, pathology, and clinical features compared to other  
194 AAV types, such as GPA and MPA.<sup>11</sup> The annotators first individually labeled 100  
195 sections and any conflicts were resolved by consensus. Then in the second dataset of  
196 100 sections, two annotators achieved near-perfect agreement with a Cohen's kappa of  
197 0.897. The remaining note sections were each annotated by one of the annotators. Any  
198 cases for which labeling was uncertain were resolved through consensus by ZSW and  
199 CC.

200

## 201 **Model Development**

202 We first implemented four basic statistical machine learning algorithms, including  
203 logistic regression, random forest, support vector machine (SVM), and XGBoost.<sup>12</sup> The  
204 note sections were processed into n-grams (where n=1). Each section was converted  
205 into term frequency-inverse document frequency vectors based on n-grams. The  
206 algorithms were trained and tested with 5-fold cross validation using the Dataset I.

207

208 We also implemented a hierarchical attention-based deep neural network, which  
209 includes a convolutional neural network for handling word variations (e.g., plural,  
210 misspelling), a recurrent neural network for handling context (e.g., negation), and  
211 attention layers for interpreting predictions. We chose this algorithm as it was previously  
212 proved to be effective in allergic reaction detection from hospital safety reports<sup>5</sup> and  
213 cognitive decline detection from clinical notes.<sup>4</sup> When implementing this deep learning  
214 algorithm, each note section was treated as a sequence of tokens, and individual words  
215 were represented by word embedding. We used pre-trained word embedding, named  
216 BioWordVec, which is an open set of biomedical word vectors that integrated  
217 biomedical text with Medical Subject Headings (MeSH) using the fastText model.<sup>13</sup>

218

219 Additionally, we implemented BioClinicalBERT, a domain-specific Bidirectional Encoder  
220 Representation from Transformers (BERT) model,<sup>14</sup> on the labeled dataset. BERT is  
221 one of the most widely-used deep contextualized language models, achieving state-of-  
222 the-art performance on various NLP tasks, including named entity recognition,

223 sentiment analysis, and question answering. We previously leveraged this algorithm to  
224 identify patient gender identity in the EHR.<sup>7</sup>

225

## 226 **Evaluation for Model Generalizability**

227 To evaluate the generalizability of the models to the dataset regardless of keywords, we  
228 applied the models trained in Dataset I to Dataset II. To evaluate the generalizability of  
229 the models to the screening cohort, we applied the models trained in Datasets I and II to  
230 Dataset III and reported the models' performance.

231

## 232 **Comparison of machine learning-based models with rule-based approaches**

233 To assess the feasibility of applying the deep learning model to identify AAV cases, we  
234 compared its efficacy with that of two rule-based algorithms derived from administrative  
235 claims data. Specifically, Rule 1 identifies patients who have any ICD-9 or ICD-10 codes  
236 documented on at least two separated occasions. Rule 2 identifies patients with any  
237 ICD-9 or ICD-10 codes recorded on at least two separated dates, and who also  
238 received an AAV medication within a 6-month window ( $\pm 6$  months) of the first ICD code  
239 recorded. For the deep learning model, we used the optimal model to analyze the  
240 clinical notes of Cohort D. The highest section-level prediction probability was  
241 considered as the patient-level model prediction probability. Patients with a predicted  
242 probability of 1 were classified as positive for AAV.

243

244 After identifying potential AAV cases using either the rule-based or the deep learning  
245 model, we conducted a manual review of the EHR for these cases to pinpoint true

246 positive cases. From the cases not deemed to be AAV (i.e., those not identified by the  
247 rules or the models), we randomly selected a subset (n=100) for manual chart review to  
248 assess the false negative rate.

249

## 250 **Statistical Analysis**

251 We evaluated four statistical machine learning models, one deep learning model, and a  
252 large language model for AAV case detection from clinical notes. Performance was  
253 assessed based on the area under the receiver operating characteristic curve (AUROC),  
254 the area under the precision-recall curve (AUPRC), positive predictive value (PPV),  
255 sensitivity, and F-1 score which accounts for both precision and recall by taking the  
256 harmonic mean. Both the AUROC and AUPRC were computed using the scikit-learn  
257 Python library (scikit-learn Developers). We estimated the 95% confidence intervals (CI)  
258 using 2,000 bootstrap iterations (Python, version 3.7; Python Software Foundation). To  
259 compare the rule-based approaches with the top-performing AAV case identification  
260 model, we computed the PPVs and sensitivities of all methods in Cohort D. Here the  
261 total number of true positive patients was determined by adding those identified by both  
262 the rule-based approaches and the top-performing AAV case identification model.

263

## 264 **RESULTS**

265 Cohort A, termed the 2002-2019 MGB AAV Cohort, included 700 PR3- or MPO-ANCA+  
266 AAV patients. From these patients, 134,506 notes were extracted from the RPDR,  
267 which included progress notes, ambulatory notes, and discharge summaries. These  
268 notes were further split into 1,927,286 sections, of which 320,038 contained keywords.

269 Dataset I comprised 6,000 note sections, representing 5,765 notes from 1,638 patients  
270 (968 [59.1%] female). Dataset II contained 3,008 sections from 2,970 notes,  
271 representing 1,501 patients (885 [60.0%] female). Dataset III included 7,500 sections,  
272 representing 5,429 notes from 1,000 patients (568 [56.8%] female) (**Table 1**). In Dataset  
273 I, evidence of AAV was present in 2,669 sections (44.5%). Dataset II had 206 (6.8%)  
274 sections positive for AAV. Out of the 3,008 sections in Dataset II, 457 contained at least  
275 one keyword, with 203 (44.4%) of these containing evidence of AAV. Dataset III had 50  
276 (0.67%) AAV-positive sections, and, of the 7,500 sections, 219 (2.92%) had one or  
277 more keywords. Of those with keywords, 45 (20.5%) contained evidence of AAV.

278

279 The performance of the five models in each dataset is outlined in **Table 2**. The  
280 hierarchical attention-based deep learning model demonstrated the best performance  
281 on Dataset I during cross-validation, significantly outperforming other models, with an  
282 AUROC of 0.983 (95% CI, 0.980-0.986) and an AUPRC of 0.977 (95% CI, 0.972-  
283 0.982). Compared to the deep learning model, Bio\_ClinicalBERT had slightly worse  
284 performance in AUROC and AUPRC in Dataset I; however, it achieved better results in  
285 precision, recall, and F-1 score.

286

287 Overall, all the models generalized well to Dataset II. The deep learning model exhibited  
288 an AUROC of 0.991 (95% CI, 0.981-0.997) and an AUPRC of 0.962 (95% CI, 0.941-  
289 0.980), with a 0.015 drop in AUPRC compared to its performance in Dataset I. Notably,  
290 in Dataset II and among all the models, the XGBoost model achieved the best

291 performance in AUPRC, though the difference was not statistically significant, and  
292 Bio\_ClinicalBERT achieved the best sensitivity and F-1 score.

293  
294 In Dataset III, the deep learning model outperformed other algorithms in all metrics.  
295 Compared to its performance in Datasets I and II, it maintained a high AUROC of 0.991  
296 (95% CI, 0.982-0.998); however, the AUPRC decreased to 0.760 (95% CI, 0.620-  
297 0.885). Both Bio\_ClinicalBERT and XGBoost saw greater decrease in performance from  
298 Datasets I and II to Dataset III.

299  
300 Among 2,000 patients from the screening cohort, Rule 1 identified 218 with two or more  
301 AAV-related ICD codes (**Table 3**). After excluding 12 patients due to insufficient  
302 information to ascertain AAV status, 40 (19.4%) were confirmed to have AAV. Rule 2  
303 identified 52 patients meeting Rule 1 criteria and receiving a medication prescription  
304 within 6 months of the first ICD code; 11 (21.2%) had confirmed AAV. Among the 2,000  
305 patients, 1,977 had clinical notes reviewed using the deep learning model, which  
306 predicted AAV in 177 patients with a probability of 1. After excluding 5 patients due to  
307 insufficient information, 45 (26.2%) patients were confirmed to have AAV.

308  
309 A review of 100 randomly selected cases, which were not predicted as AAV by either  
310 method, confirmed the absence of AAV cases. If both the rules and the deep learning  
311 algorithms identified all positive AAV cases among the 2000 cases reviewed, the total  
312 number of positive cases amounted to 46. The estimated sensitivities for the deep  
313 learning model, Rule 1, and Rule 2 were 97.5%, 87.0%, and 23.9%, respectively.

314  
315 Significant differences were observed when comparing patients identified by the deep  
316 learning model versus rule-based algorithms (**Table 3**). The deep learning model  
317 identified a more ethnically diverse group (Hispanic: 24% vs 2.5% and 0%, respectively)  
318 and more ANCA-negative AAV cases. The deep learning model found six additional  
319 patients not identified by Rule 1, accounting for 13.0% of the positive cases, and Rule 1  
320 found one not identified by the deep learning model.

321

## 322 **Error Analysis**

323 We analyzed the sections of clinical notes which the deep learning model falsely  
324 predicted as consistent (false positive) with or not consistent (false negative) with AAV.

325 Many of the false positive errors can be grouped into three categories.

326 1. Ambiguous terms related to AAV. Some terms that appear in clinical notes  
327 occasionally correspond to unrelated concepts with identical spelling. For example, the  
328 abbreviation “MPA” might denote microscopic polyangiitis, which is pertinent to AAV, or  
329 it could represent unrelated concepts like a multipurpose angiographic catheter or a  
330 Master of Public Administration degree. Similarly, “GPA” can be used to abbreviate  
331 grade point average.

332 2, Hypothetical scenarios in notes. Prediction errors also arose in note sections  
333 described conjectural situations, such as guidelines of diagnosing AAV or potential  
334 medication side effects (e.g., risks of anti-thyroid medications).

335 3. Notes detailing family history. The model made false positive predictions on notes  
336 that mentioned a patient's family member being diagnosed with AAV, even though the  
337 patient in question was not diagnosed.

338  
339 False negative errors can be attributed to various representation of AAV-related  
340 keywords: 1. Dictation errors or misspellings. Some false negative cases contain typos  
341 of AAV-related terms or instances of terms transcribed incorrectly (e.g., "Wagner's"  
342 instead of "Wegener's").

343 2. Combined terms. Certain terms related to AAV were mentioned as part of large  
344 tokens, which might not be recognized by the deep learning model. For instance,  
345 "ANCA+MPO+vasculitis" or "GPA/Wegener's" were treated as distinct or unrelated  
346 compared to simpler terms like "ANCA+" or "GPA" or "Wegener's".

347 3. Rare variations of AAV-related terms, such as, "WEgeners", "WEGENER'S" or  
348 "GRANULOMATOSIS", which might not be well recognized by the deep learning model.

349  
350 When assessing model performance in 2,000 random patients from our screening  
351 cohort, six patients were identified by the deep learning model but not by the rule-based  
352 algorithm. After reviewing their charts, there are two potential reasons for these patients  
353 were not captured by the rule-based algorithms. First, three patients were diagnosed  
354 with AAV at institutions external to MGB so ICD codes for AAV were not used in  
355 encounters in our healthcare system. Second, three patients had only one diagnosis  
356 code, which did not meet the criteria of our rule-based algorithm. One patient identified  
357 solely by the rule-based algorithm had positive ANCA pathology reports external to



358 MGB, which weren't included in the note screening. Available clinical notes lacked other  
359 specific features of AAV in this case.

360

## 361 **DISCUSSION**

362 We found that a deep learning algorithm that integrated convolutional neural network,  
363 recurrent neural network, and an attention mechanism trained using a small set of  
364 keyword-identified, manually labeled note sections can be accurate and useful for  
365 identifying a rare disease like AAV in a large cohort. The model performance in dataset I  
366 showed its great capacity for detecting relevant signals from free-text narratives to make  
367 accurate predictions. The model was generalizable to notes, regardless of the presence  
368 of keywords. When applied to notes of patients from a large screening cohort for AAV  
369 case identification, the deep learning model out-performed the traditional rule-based  
370 algorithms which rely on ICD codes with or without medication prescriptions.

371

372 In addition to assessing the performance of the deep learning model, we also evaluated  
373 the performance of rule-based algorithms using ICD codes and medication prescriptions  
374 in our healthcare system. This is the first study that incorporates ICD-10 codes into an  
375 assessment of performance of this rule-based algorithm. We found that these rule-  
376 based algorithms had a PPV worse than that of the deep-learning model and that  
377 incorporating medication prescriptions into the rule only slightly improved the PPV by  
378 1.8%. In contrast, requiring a medication prescription significantly reduced sensitivity.  
379 These observations speak to the need for innovative approaches, such as deep  
380 learning, for developing new approaches for AAV case identification.

381  
382 In comparing the deep learning approach with the ICD/medication-based rules, the  
383 former demonstrated higher sensitivity and PPV. Examining clinical notes proved  
384 beneficial in identifying additional cases, particularly those with a more remote history of  
385 AAV or those diagnosed with AAV outside the MGB system. It also addressed cases  
386 missed by the rule-based algorithm due to a limited number of ICD codes in the EHR.  
387 This will be helpful for identifying patients, for instance, who have severe disease and  
388 die during their initial admission for AAV. This is particularly crucial in rare diseases,  
389 where even a small increase in sample size and including patients with the most severe  
390 spectrum of disease can significantly impact studies. While clinical notes revealed only  
391 6 additional cases in a sample of 2,000, after extrapolating these observations to the  
392 entire screening cohort (n=88,902) we suspect that the deep learning model could  
393 identify approximately 7,868 patients, with an estimated 2,000 of them having AAV.  
394 Compared with a rule-based algorithm approach, the deep learning algorithms could  
395 identify an additional 267 patients while reducing the need for extensive chart reviews  
396 by more than 1,823 patients.

397  
398 Compared with rule-based algorithms, we found that the deep learning model more  
399 often identified patients of Hispanic background and those with ANCA-negative disease.  
400 Why the deep learning model may have yielded a cohort with greater ethnic diversity is  
401 unclear. One possibility has to do with differences in the way that ICD codes are used  
402 for billing between people of different racial or ethnic backgrounds or because of the  
403 way patients of different racial or ethnic backgrounds interact with the healthcare

404 system. The ability of the deep learning model to identify a greater proportion of cases  
405 with ANCA-negative granulomatosis with polyangiitis is another strength of this  
406 approach. This population is often excluded from observational studies of AAV as well  
407 as clinical trials and the ability to identify them easily will facilitate research of this  
408 subgroup.

409  
410 Our findings suggest that applying a deep learning model may have benefit regarding  
411 the efficiency of AAV cases identification. Rule-based approaches to AAV case finding  
412 which identify potential AAV cases through billing codes with or without medications  
413 typically necessitates a full chart review. In contrast, the deep learning model approach  
414 presents a significant advantage because once the model flags sections that are  
415 potentially related to AAV, only these specific sections typically require review,  
416 potentially reducing the need for comprehensive chart evaluation.

417  
418 Our study has several strengths. First, it was conducted in a large healthcare system  
419 that includes both quaternary academic medical centers in addition to community  
420 hospitals, primary care and specialty clinics, as well as specialty hospitals (e.g., ear,  
421 nose throat hospital). Second, we applied four statistical machine learning models and  
422 assessed their performance in comparison to commonly used rules-based algorithms.  
423 Third, we assessed model performance using training and multiple validation datasets.

424  
425 Despite these strengths, this study has certain limitations. First, we used data from a  
426 single healthcare system so the model was not evaluated for its generalizability using

427 data from other institutions. This is an important next step in the development of deep  
428 learning models to identify AAV cases. Second, the deep learning model was learned  
429 from a small dataset, of which the vocabulary size might be relatively small. This might  
430 affect the performance of the model when applied to a dataset with a larger vocabulary  
431 size. Third, the current approach leveraged only clinical notes to identify potential AAV  
432 cases. It is possible that including other data sources for model learning, such as lab  
433 results, may improve the performance of algorithms for identifying AAV cases. Fourth,  
434 we noted a large decline in the PPV when we applied the deep learning model, which  
435 was trained and assessed at the level of sections from notes, to classify at the patient  
436 level. This decrease can be attributed to the aggregation of errors from multiple note  
437 sections per patient, which, when accumulated at the patient level, magnify the error  
438 rate.

439  
440 Our findings highlight the potential role of deep learning models for identifying positive  
441 AAV cases from large screening cohorts. Moving forward, we intend to leverage our  
442 deep learning model to screen the entire cohort, anticipating the identification of over  
443 2,000 AAV cases. A cohort of this size would be substantially larger than the current  
444 cohort assembled during a similar timeframe which includes fewer than 1,000 cases.  
445 Thus, this represents a significant opportunity to expand the current MGB AAV cohort.  
446 Furthermore, in the wake of the rise of sophisticated large language models, such as  
447 GPT-4, an intriguing avenue of research would be to compare the performance of our  
448 deep learning model with these state-of-the-art language models. The evolution of

449 natural language processing tools offers promising opportunities to further enhance the  
450 accuracy and efficiency of clinical data mining and disease identification.

## 451 **CONCLUSION**

452 This study is the first to show that a deep learning algorithm can efficiently and  
453 accurately identify cases of AAV, a prototypic rare condition, in part by only using  
454 unstructured EHR data. This approach has the potential to identify cases that may be  
455 overlooked if only using structured EHR data. This approach to case identification may  
456 improve the spectrum of disease captured for observational studies and reduce the time  
457 and resources often needed to review electronic health records. Future work will involve  
458 deploying the model to screen a broader cohort for potential AAV patients and  
459 assessing performance in other healthcare systems.

## 460 **ACKNOWLEDGEMENTS**

461

462

## References

- 463 1. Kitching AR, Anders H-J, Basu N, Brouwer E, Gordon J, Jayne DR, et al. ANCA-  
464 associated vasculitis. *Nature reviews Disease primers*. 2020;6(1):71.
- 465 2. Tan JA, Dehghan N, Chen W, Xie H, Esdaile JM, Avina-Zubieta JA. Mortality in  
466 ANCA-associated vasculitis: ameta-analysis of observational studies. *Annals of the*  
467 *rheumatic diseases*. 2017;76(9):1566-74.
- 468 3. Wang L, Miloslavsky E, Stone JH, Choi HK, Zhou L, Wallace ZS. Topic modeling  
469 to characterize the natural history of ANCA-Associated vasculitis from clinical notes: A  
470 proof of concept study. *Semin Arthritis Rheum*. 2021;51(1):150-7. PMID: 33383291.
- 471 4. Wang L, Laurentiev J, Yang J, Lo YC, Amariglio RE, Blacker D, et al.  
472 Development and Validation of a Deep Learning Model for Earlier Detection of Cognitive  
473 Decline From Clinical Notes in Electronic Health Records. *JAMA Netw Open*.  
474 2021;4(11):e2135174. PMID: 34792589.
- 475 5. Yang J, Wang L, Phadke NA, Wickner PG, Mancini CM, Blumenthal KG, et al.  
476 Development and Validation of a Deep Learning Model for Detection of Allergic  
477 Reactions Using Safety Event Reports Across Hospitals. *JAMA Netw Open*.  
478 2020;3(11):e2022836. PMID: 33196805.
- 479 6. Shao Y, Zeng QT, Chen KK, Shutes-David A, Thielke SM, Tsuang DW.  
480 Detection of probable dementia cases in undiagnosed patients using structured and  
481 unstructured electronic health records. *BMC Med Inform Decis Mak*. 2019;19(1):128.  
482 PMID: 31288818.

- 483 7. Hua Y, Wang L, Nguyen V, Rieu-Werden M, McDowell A, Bates DW, et al. A  
484 deep learning approach for transgender and gender diverse patient identification in  
485 electronic health records. *J Biomed Inform.* 2023;147:104507. PMID: 37778672.
- 486 8. Wallace ZS, Fu X, Cook C, Ahola C, Williams Z, Doliner B, et al. Comparative  
487 Effectiveness of Rituximab- Versus Cyclophosphamide-Based Remission Induction  
488 Strategies in Antineutrophil Cytoplasmic Antibody-Associated Vasculitis for the Risk of  
489 Kidney Failure and Mortality. *Arthritis Rheumatol.* 2023;75(9):1599-607. PMID:  
490 37011036.
- 491 9. Zhou L, Plasek JM, Mahoney LM, Karipineni N, Chang F, Yan X, et al. Using  
492 Medical Text Extraction, Reasoning and Mapping System (MTERMS) to process  
493 medication information in outpatient clinical notes. *AMIA Annu Symp Proc.*  
494 2011;2011:1639-48. PMID: 22195230.
- 495 10. Watts R, Lane S, Hanslik T, Hauser T, Hellmich B, Koldingsnes W, et al.  
496 Development and validation of a consensus methodology for the classification of the  
497 ANCA-associated vasculitides and polyarteritis nodosa for epidemiological studies. *Ann*  
498 *Rheum Dis.* 2007;66(2):222-7. PMID: 16901958.
- 499 11. Kitching AR, Anders HJ, Basu N, Brouwer E, Gordon J, Jayne DR, et al. ANCA-  
500 associated vasculitis. *Nat Rev Dis Primers.* 2020;6(1):71. PMID: 32855422.
- 501 12. Chen T, Guestrin C, editors. Xgboost: A scalable tree boosting system.  
502 *Proceedings of the 22nd acm sigkdd international conference on knowledge discovery*  
503 *and data mining; 2016.*
- 504 13. Zhang Y, Chen Q, Yang Z, Lin H, Lu Z. BioWordVec, improving biomedical word  
505 embeddings with subword information and MeSH. *Scientific data.* 2019;6(1):52.

506 14. Devlin J, Chang M-W, Lee K, Toutanova K. Bert: Pre-training of deep  
507 bidirectional transformers for language understanding. arXiv preprint arXiv:181004805.  
508 2018.

509

510



511 **Table 1.** Characteristics of the datasets I, II and III for the development and validation of models  
512 for identifying evidence of ANCA vasculitis.

| <b>Characteristic</b>                                                              | <b>Dataset I</b> | <b>Dataset II</b> | <b>Dataset III</b> |
|------------------------------------------------------------------------------------|------------------|-------------------|--------------------|
| Sections, n                                                                        | 6,000            | 3,008             | 7,500              |
| Notes, n                                                                           | 5,765            | 2,970             | 5,429              |
| Character length per section, mean (SD)                                            | 839 (793)        | 443 (566)         | 410 (551)          |
| Unique patients, n                                                                 | 1,638            | 1,501             | 1,000              |
| Female, n (%)                                                                      | 968 (59.1)       | 885 (60.0)        | 568 (56.8)         |
| Keyword present, n (%)                                                             | 6,000 (100)      | 457 (15.2)        | 219 (2.9)          |
| Sections consistent with a diagnosis of AAV, n (%)                                 | 2,669 (44.5)     | 206 (6.8)         | 50 (0.67)          |
| Sections consistent with AAV diagnosis and containing a keyword of interest, n (%) | 2,669 (44.5)     | 203 (44.4)        | 45 (20.5)          |

513 Abbreviations: AAV, ANCA-associated vasculitis; SD, standard deviation

514

**Table 2.** Performance of four machine learning models for detecting AAV from clinical notes

| Model                                    | AUROC (95% CI)             | AUPRC (95% CI)             | PPV          | Sensitivity  | F-1 Score    |
|------------------------------------------|----------------------------|----------------------------|--------------|--------------|--------------|
| <b>Dataset I (6,000 Note Sections)</b>   |                            |                            |              |              |              |
| Logistic Regression                      | 0.923 (0.916-0.930)        | 0.892 (0.879-0.904)        | 0.857        | 0.777        | 0.815        |
| Random Forest                            | 0.929 (0.922-0.935)        | 0.888 (0.874-0.902)        | 0.808        | 0.886        | 0.845        |
| SVM                                      | 0.938 (0.932-0.944)        | 0.912 (0.901-0.923)        | 0.848        | 0.862        | 0.855        |
| XGBoost                                  | 0.957 (0.952-0.962)        | 0.939 (0.929-0.948)        | 0.916        | 0.896        | 0.906        |
| Bio_ClinicalBERT                         | 0.957 (0.945-0.968)        | 0.962 (0.950- 0.972)       | <b>0.947</b> | <b>0.956</b> | <b>0.952</b> |
| Deep Learning                            | <b>0.983 (0.980-0.986)</b> | <b>0.977 (0.972-0.982)</b> | 0.941        | 0.951        | 0.946        |
| <b>Dataset II (3,008 Note Sections)</b>  |                            |                            |              |              |              |
| Logistic Regression                      | 0.981 (0.969-0.991)        | 0.893 (0.858-0.925)        | 0.709        | 0.874        | 0.783        |
| Random Forest                            | 0.983 (0.976-0.989)        | 0.871 (0.832-0.904)        | 0.528        | 0.922        | 0.671        |
| SVM                                      | 0.983 (0.971-0.991)        | 0.910 (0.880-0.939)        | 0.645        | 0.908        | 0.754        |
| XGBoost                                  | 0.990 (0.981-0.997)        | <b>0.963 (0.941-0.981)</b> | 0.886        | 0.947        | 0.915        |
| Bio_ClinicalBERT                         | 0.981 (0.967-0.992)        | 0.954 (0.933-0.973)        | 0.939        | <b>0.966</b> | <b>0.952</b> |
| Deep Learning                            | <b>0.991 (0.981-0.997)</b> | 0.962 (0.941-0.980)        | <b>0.954</b> | 0.898        | 0.925        |
| <b>Dataset III (7,500 Note Sections)</b> |                            |                            |              |              |              |
| Logistic Regression                      | 0.940 (0.906-0.967)        | 0.390 (0.259-0.534)        | 0.109        | 0.720        | 0.189        |
| Random Forest                            | 0.975 (0.962-0.986)        | 0.392 (0.258-0.529)        | 0.064        | 0.900        | 0.120        |
| SVM                                      | 0.907 (0.861-0.948)        | 0.402 (0.264-0.538)        | 0.080        | 0.700        | 0.143        |
| XGBoost                                  | 0.982 (0.955-0.996)        | 0.490 (0.359-0.633)        | 0.320        | 0.800        | 0.457        |
| Bio_ClinicalBERT                         | 0.857 (0.792-0.917)        | 0.570 (0.473-0.659)        | 0.419        | 0.720        | 0.529        |
| Deep Learning                            | <b>0.991 (0.982-0.998)</b> | <b>0.760 (0.620-0.885)</b> | <b>0.800</b> | <b>0.800</b> | <b>0.800</b> |

515 Abbreviations: SVM, support vector machine; AUROC, area under the receiver operating  
516 characteristic curve; AUPRC, the area under the precision-recall curve; PPV, positive predictive  
517 value. Bold highlights the best performing model according to each measure.

518

519

520

521 **Table 3.** Characteristics of patients identified identified by the deep learning model and two rule-  
 522 based algorithms among 2,000 random sample of the screening cohort.

|                                | <b>Deep Learning</b>       | <b>Rule 1</b>      | <b>Rule 2</b>    |
|--------------------------------|----------------------------|--------------------|------------------|
| <b>N</b>                       | 177                        | 218                | 52               |
| <b>AAV</b>                     | 45                         | 40                 | 11               |
| <b>Age at diagnosis, years</b> | N = 43 (2 unknown)         | N = 38 (2 unknown) | N = 11           |
| Mean (SD)                      | 54.79 (20.61)              | 55.97 (20.27)      | 56.64 (19.74)    |
| Median (IQR)                   | 60 (37 – 72)               | 60 (37.25 – 73.75) | 60 (44.5 – 70.5) |
| <b>Sex, female, n (%)</b>      | 35 (77.78)                 | 31 (77.50)         | 9 (81.82)        |
| <b>Race, n (%)</b>             |                            |                    |                  |
| White                          | 38 (84.4)                  | 33 (82.50)         | 10 (90.91)       |
| Black                          | 1 (2.2)                    | 1 (2.50)           | 0                |
| Asian                          | 1 (2.2)                    | 1 (2.50)           | 0                |
| Other                          | 1 (2.22%)                  | 1 (2.50)           | 0                |
| Unavailable                    | 3 (6.67%)                  | 3 (7.50)           | 0                |
| Declined                       | 1 (2.22%)                  | 1 (2.50)           | 1 (9.09)         |
| <b>Ethnicity, n (%)</b>        |                            |                    |                  |
| Not Hispanic                   | 33 (73.33%)                | 29 (72.5)          | 8 (72.73%)       |
| Hispanic                       | 11 (24.44%)                | 1 (2.5)            | 0                |
| Unavailable                    | 1 (2.22%)                  | 10 (25.00%)        | 3 (27.27%)       |
| <b>ANCA Positive, n (%)</b>    | 40 (88.89%)<br>(1 unknown) | 37 (92.50%)        | 11 (100%)        |
| <b>ANCA Type, n (%)</b>        |                            |                    |                  |
| MPO                            | 24 (53.33%)                | 23 (57.50%)        | 7 (63.64%)       |
| PR3                            | 14 (31.11%)                | 13 (32.50%)        | 3 (27.27%)       |
| Neither                        | 4 (8.89%)                  | 3 (7.50%)          | 0                |
| Unknown                        | 3 (6.67%)                  | 1 (2.50%)          | 1 (9.09%)        |

523 Abbreviation: AAV, ANCA-associated vasculitis; SD, standard deviation; IQR, Interquartile  
 524 range; MPO, Myeloperoxidase; PR3, proteinase 3.

525  
 526

527 **Figure Legends**

528 **Figure 1.** Two-Phase Process for Identifying ANCA-Associated Vasculitis Cases. Phase  
529 1 entails dataset creation along with the training and evaluation of models. Phase 2  
530 compared the performance of the deep learning model with two rule-based algorithms.

531

532

533 **Figure 2.** Performance of the Machine Learning and Deep Learning Algorithms on  
534 Datasets I, II, and III. A. Precision-recall curves for Dataset I. B. Receiver operating  
535 characteristic (ROC) curves for Dataset I. C. Precision-recall curves for Dataset II. D.  
536 ROC curves for Dataset II. E. Precision-recall curves for Dataset III. F. ROC curves for  
537 Dataset III.

538

539

540

**Screening Cohort:** Patients identified from the entire RPDR database by ICD codes and/or keywords  
( n = 88,902)

**Cohort A**  
Validated patients with AAV  
( n = 700 )

**Cohort B**  
Randomly selected patients  
( n = 1000 )

**Cohort C**  
Randomly selected patients  
( n = 1000 )

**Cohort D**  
Randomly selected patients  
( n = 2000 )

Sectionization of clinical notes

Sectionization of clinical notes

Sectionization of clinical notes

Identification of sections with keywords

Randomization of sections

5000 sections from **Cohort A** and 1000 sections from **Cohort B**

2000 sections from **Cohort A** and 1008 sections from **Cohort B**

7500 sections from **Cohort C**

Annotation of individual sections for AAV

Dataset I

Dataset II

Dataset III

Feature engineering

Model development and evaluation

Model generalizability evaluation (regardless of keywords)

Model generalizability evaluation (on a subset of testing cohort)

Apply deep learning model to screen clinical notes

Apply rule-based algorithms to screen diagnosis and medication

Statistical analysis

Phase I: Development and Validation of Deep Learning Models for Section Classification

Phase II: AAV Case Identification

medRxiv preprint doi: <https://doi.org/10.1101/2024.06.09.24308603>; this version posted June 10, 2024. The copyright holder for this preprint (which was not certified by peer review) is the author/funder, who has granted medRxiv a license to display the preprint in perpetuity. It is made available under a [CC-BY-NC-ND 4.0 International license](https://creativecommons.org/licenses/by-nc-nd/4.0/).

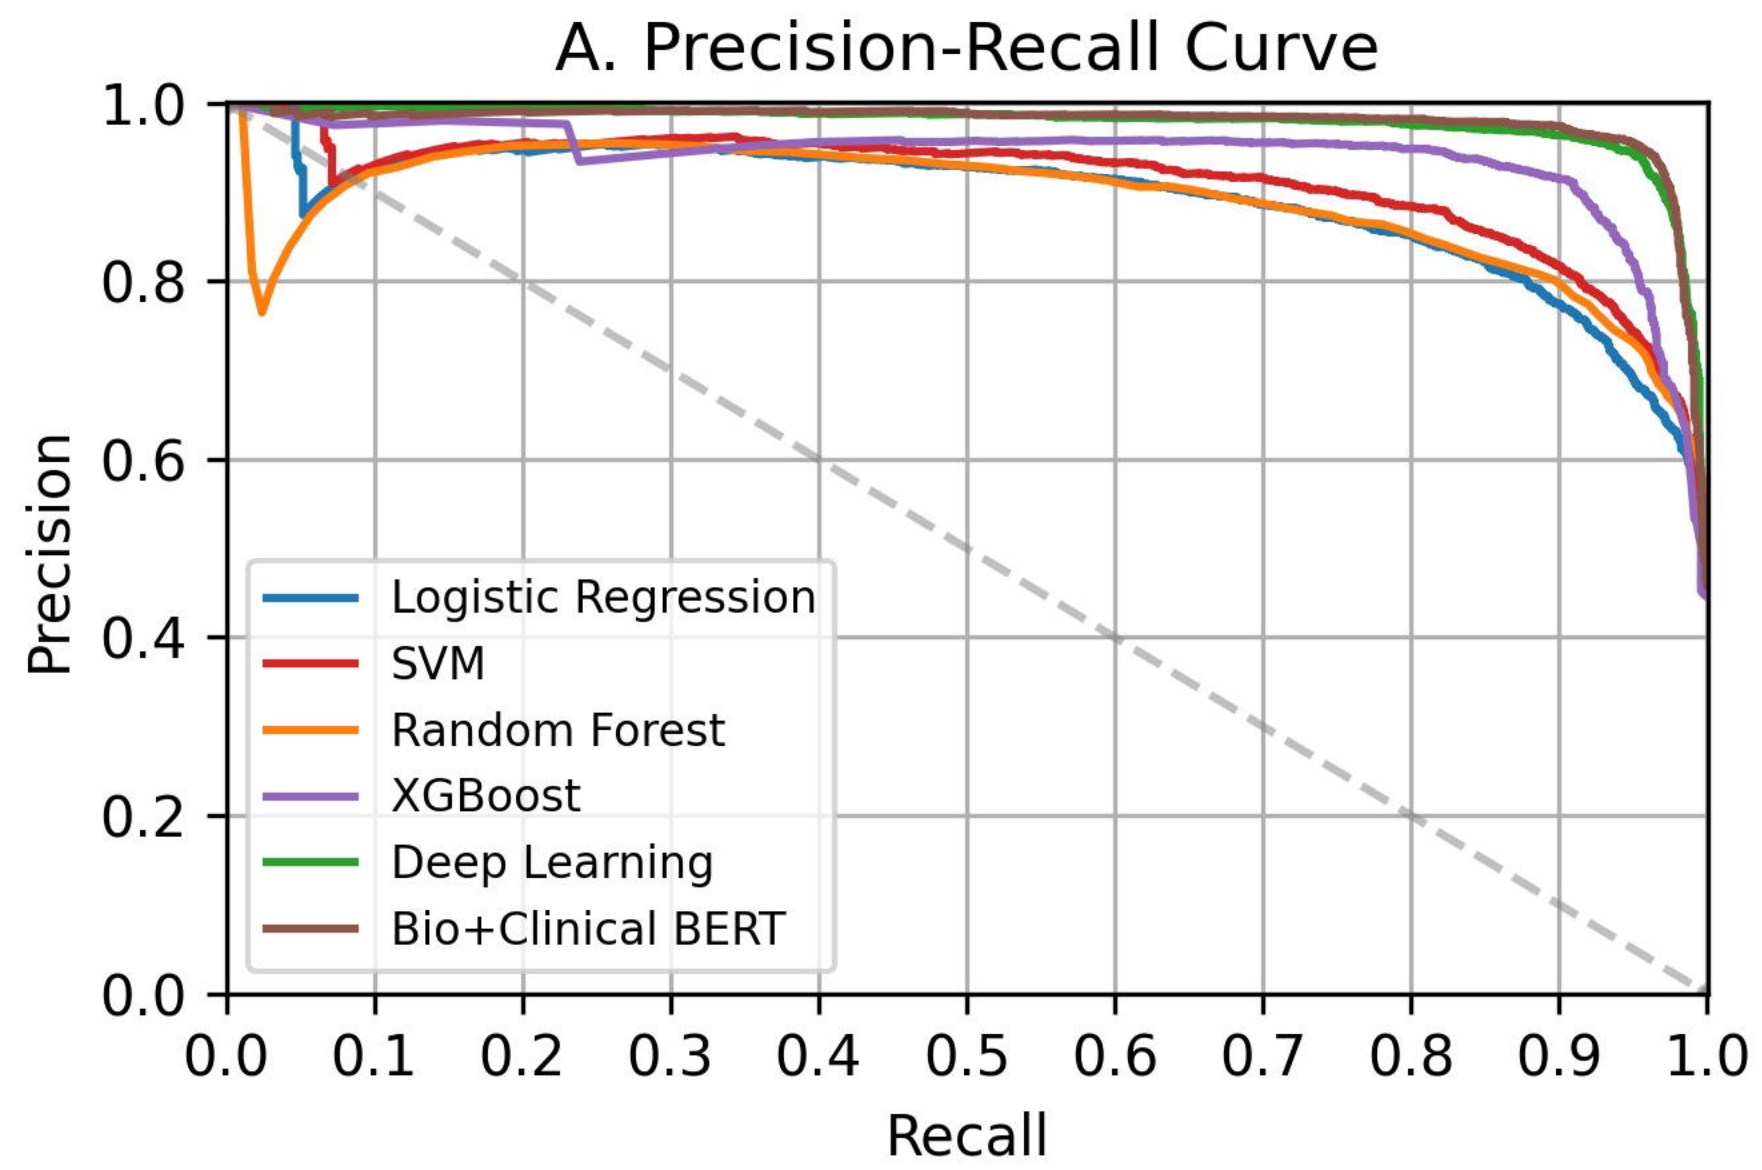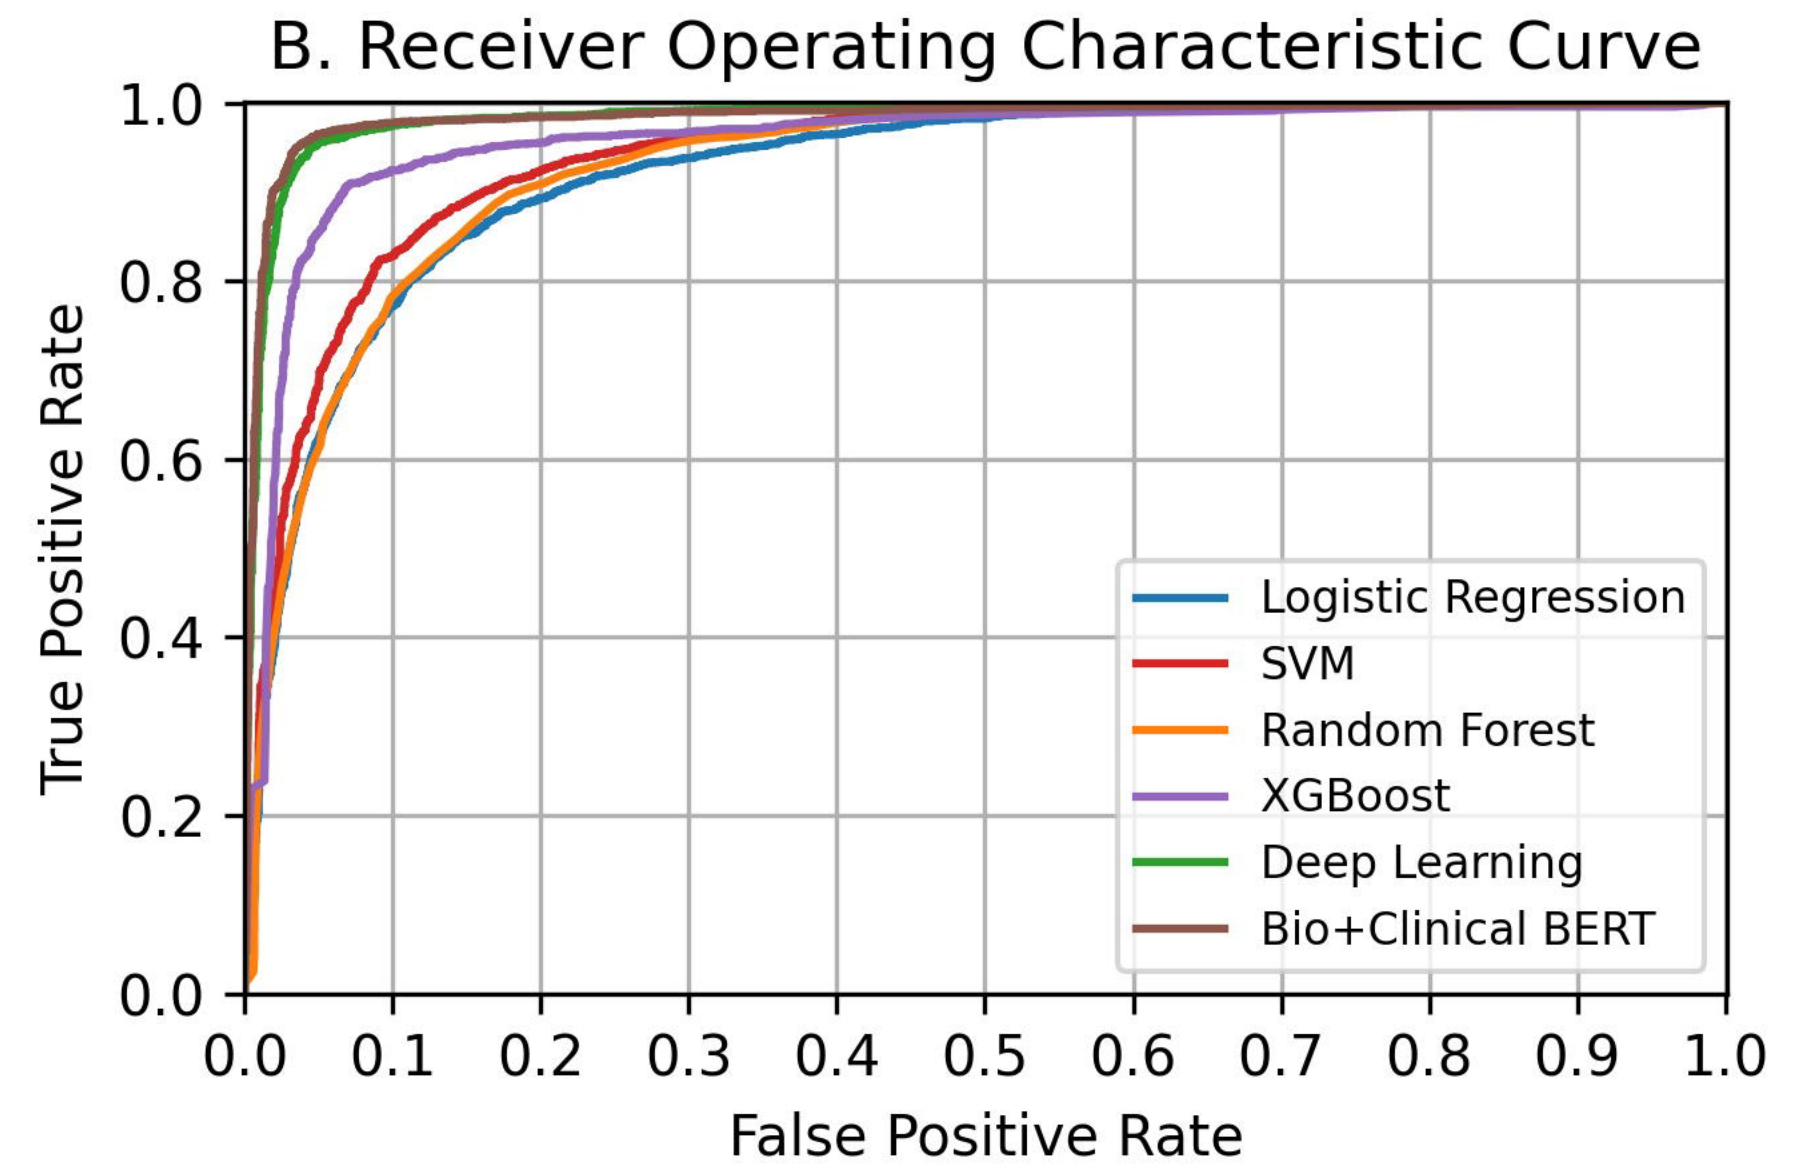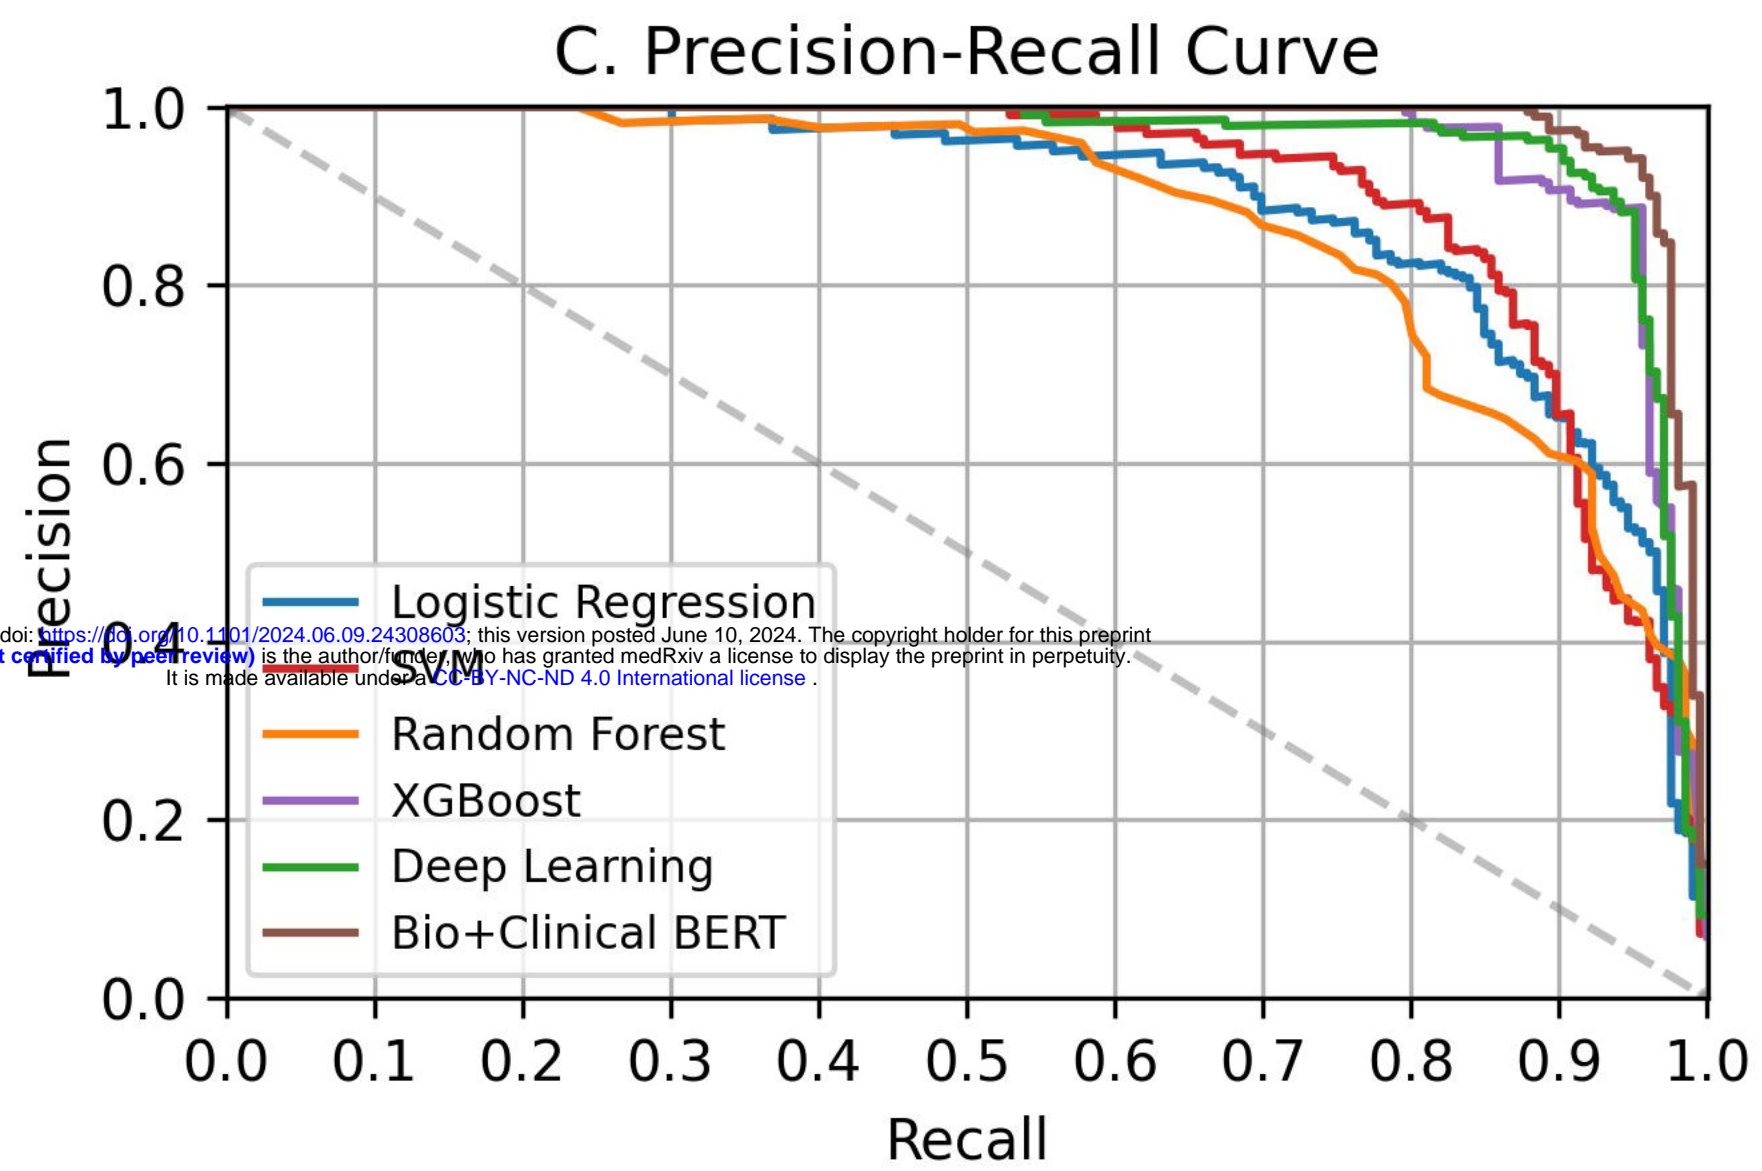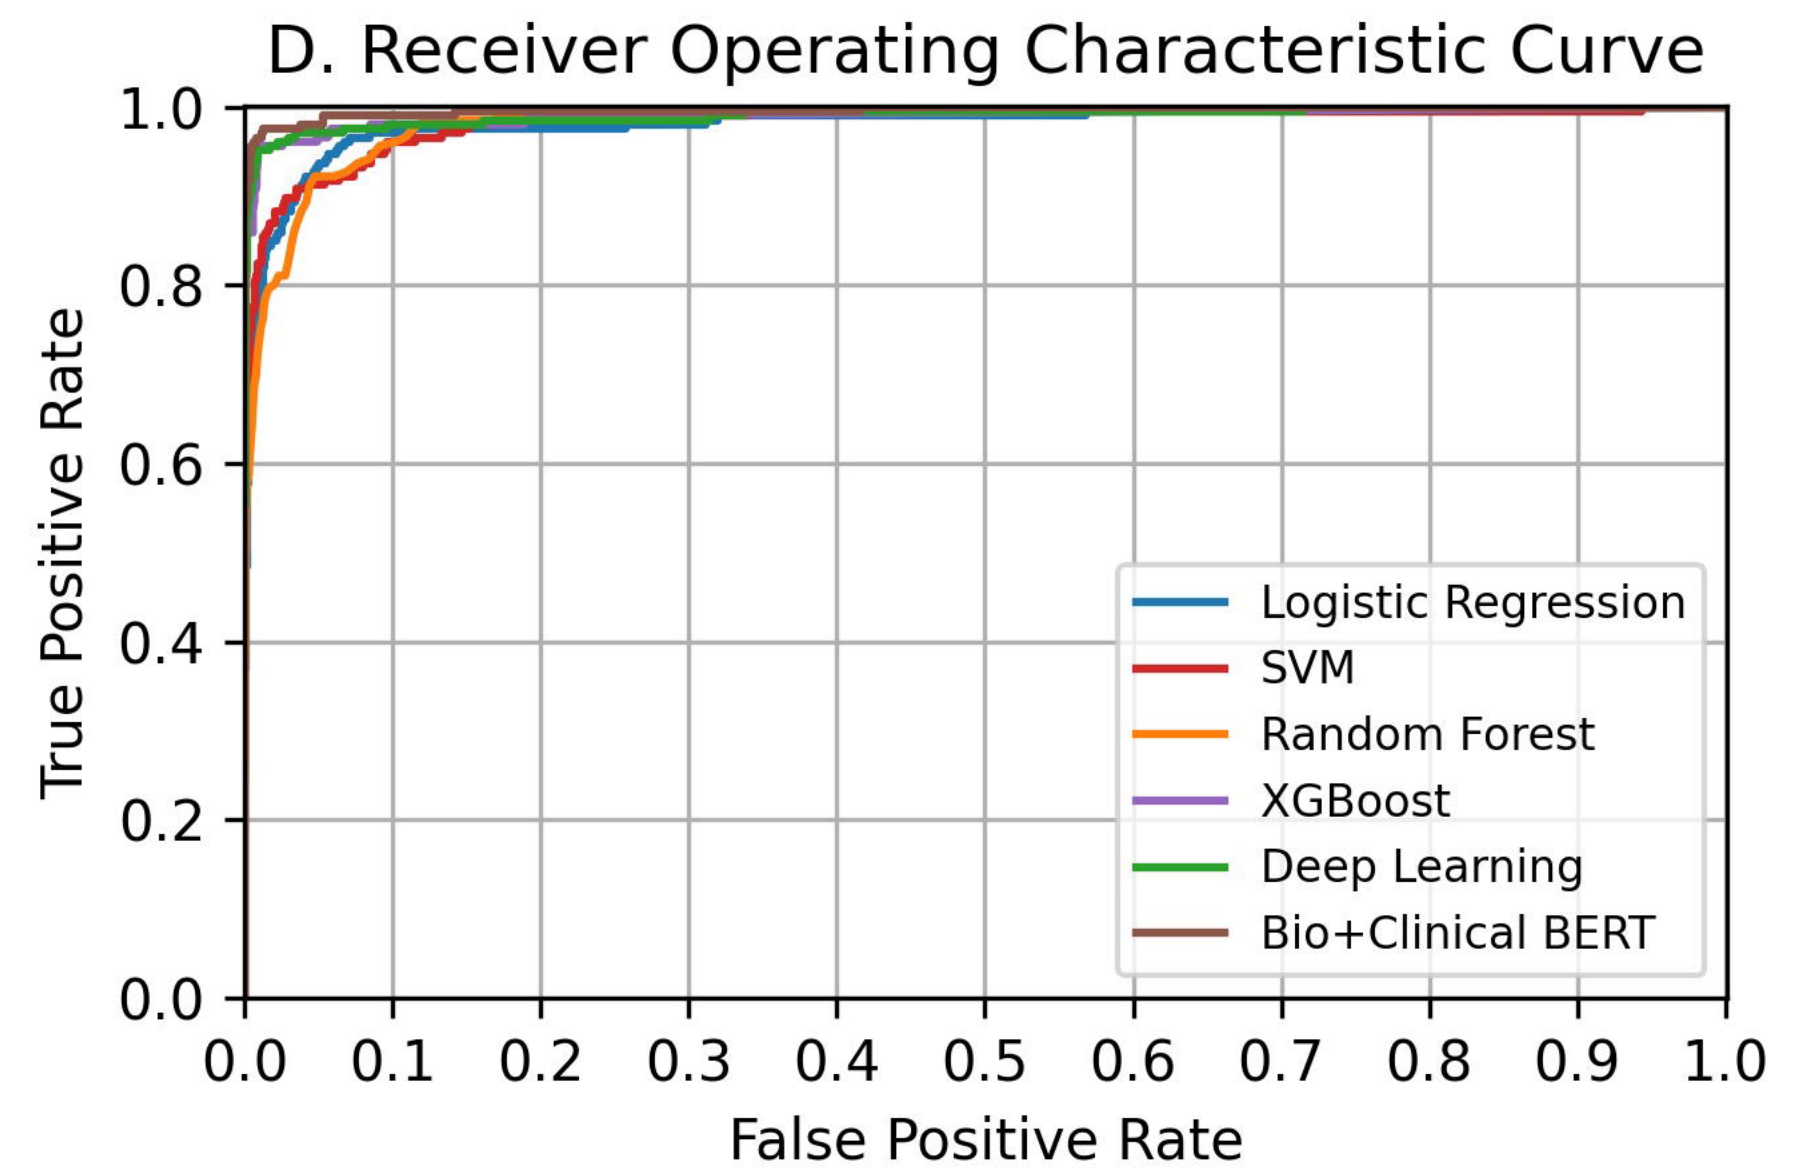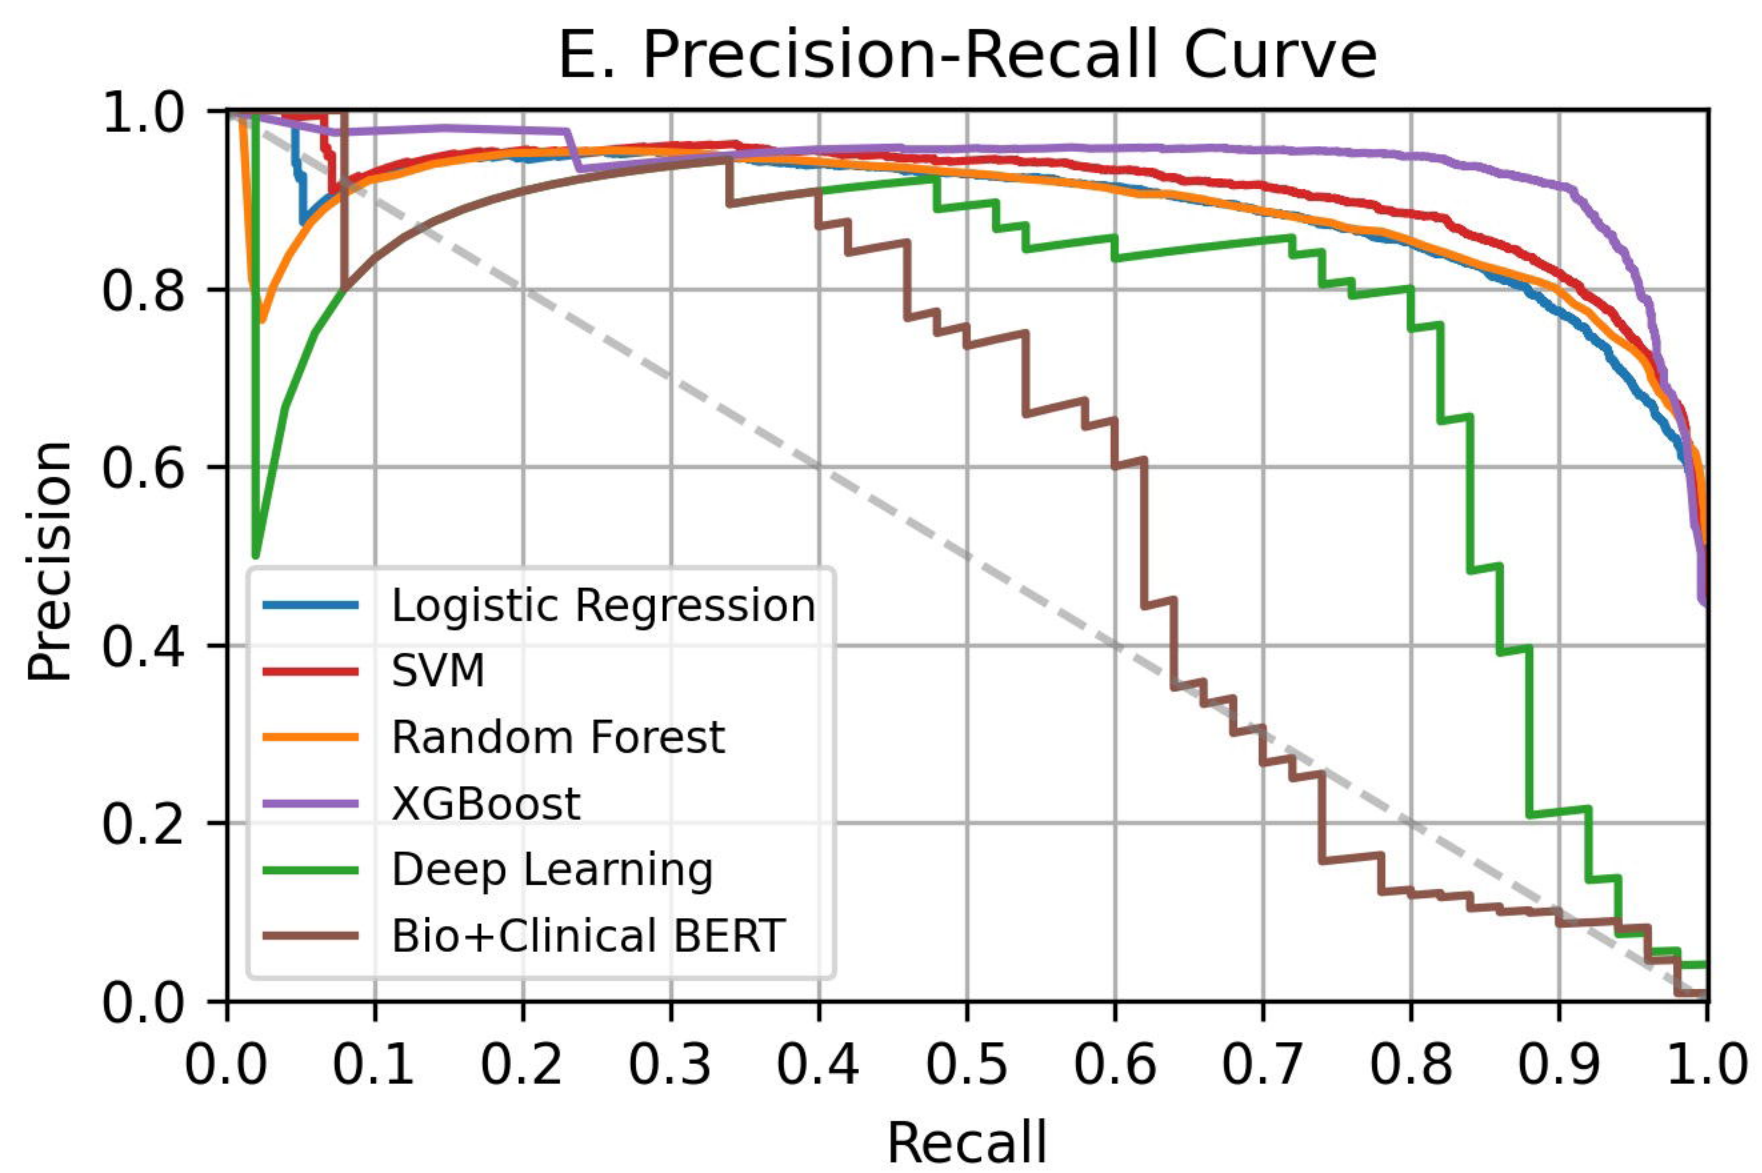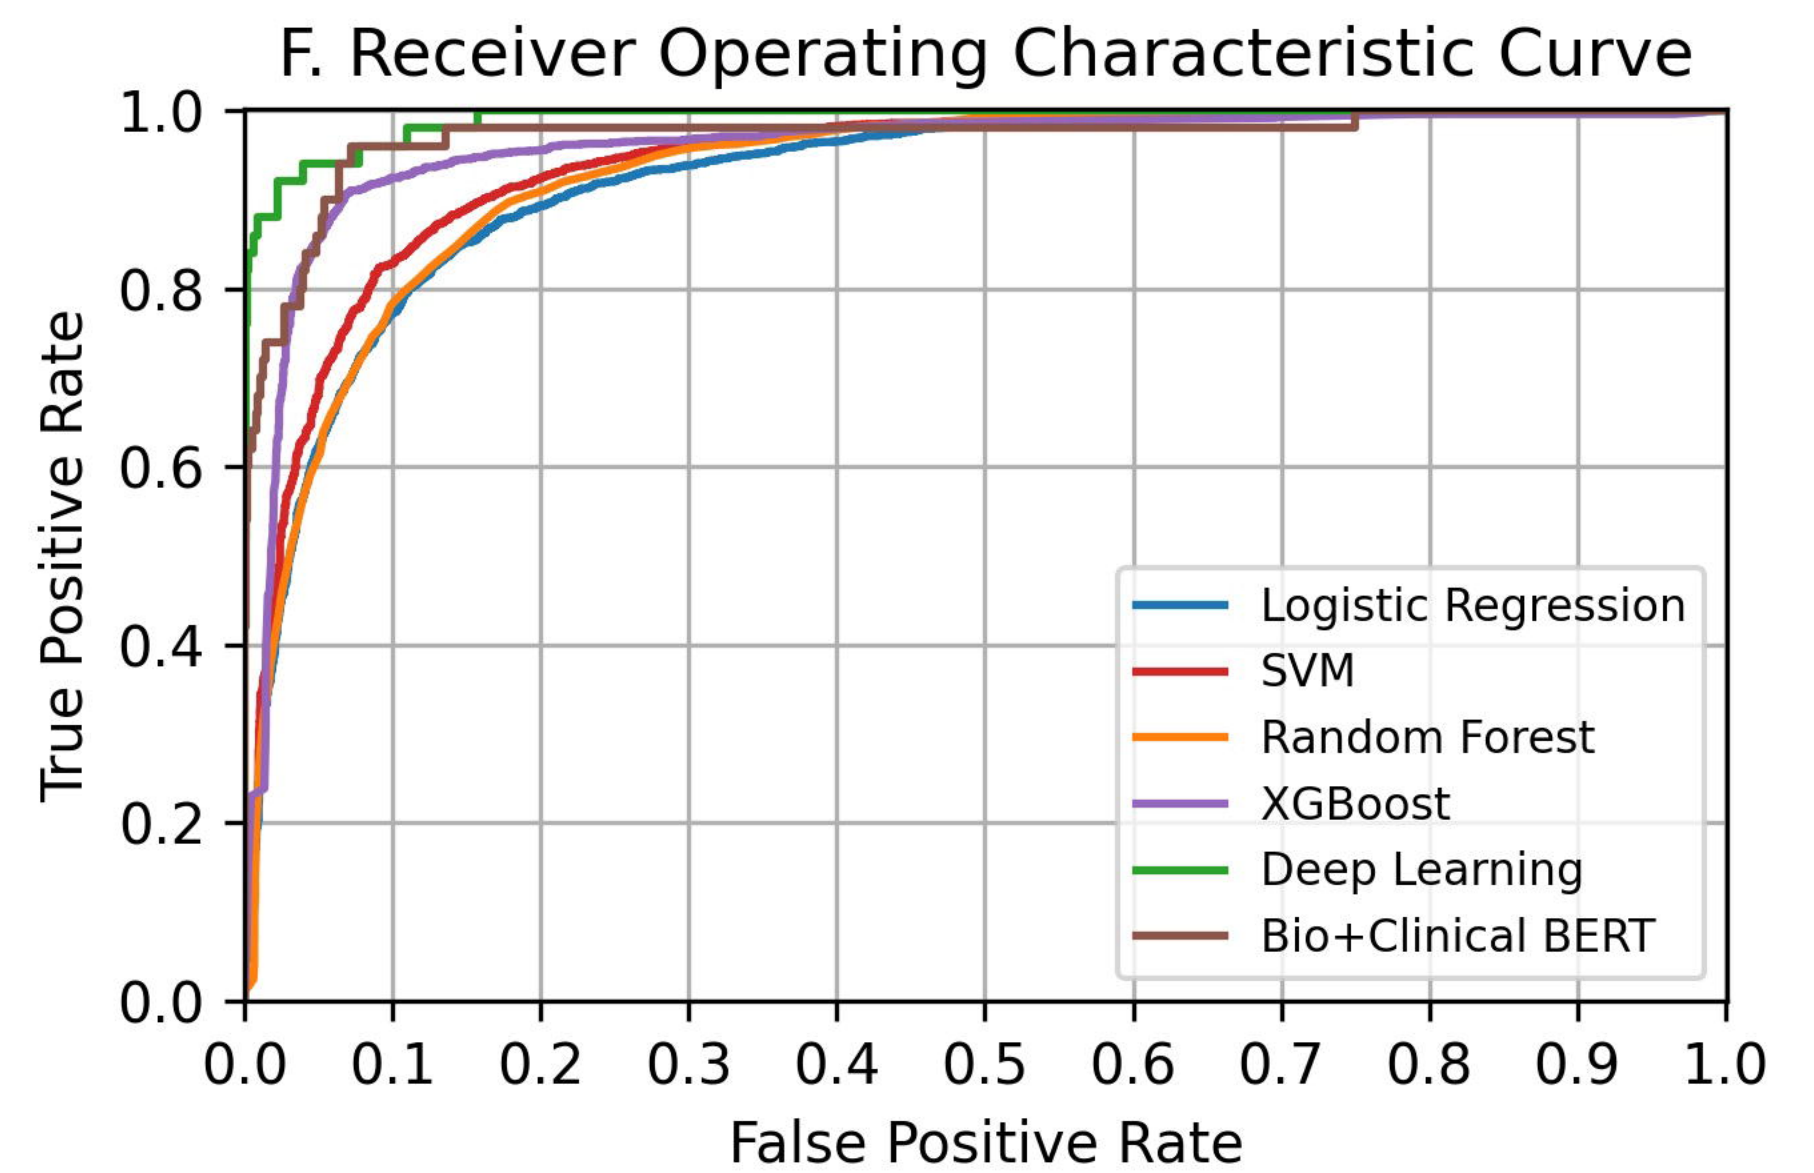

Source: https://medrxiv.org/content/10.1101/2024.06.09.24308603v1.full.pdf
